# Supplementary material for: Rapidly fabricating a large area nanotip microstructure for high-sensitivity SERS applications
Source: Royal Society of Chemistry journal article supplement (doi:10.1039/c9nr05168f), 2019-01-01
Supplement: c9nr05168f1.pdf [file c9nr05168f1.pdf]

## Rapidly fabricating large area nanotip microstructure for high-sensitivity SERS applications

Jing Ma<sup>a,b</sup>, Wen Liu<sup>a</sup>, Zhe Ma<sup>a,b</sup>, Peishuai Song<sup>a,c</sup>, Yongqiang Zhao<sup>a,b</sup>, Fuhua Yang<sup>a,f</sup> and Xiaodong Wang<sup>a-e\*</sup>

a. Engineering Research Center for Semiconductor Integrated Technology, Institute of Semiconductors, Chinese Academy of Sciences, Beijing 100083, China.

b. Center of Materials Science and Optoelectronics Engineering, University of Chinese Academy of Sciences, Beijing 100049, China.

c. School of microelectronics, University of Chinese Academy of Sciences, Beijing 100049, China.

d. Beijing Academy of Quantum Information Science, Beijing 100193, China.

e. Beijing Engineering Research Center of Semiconductor Micro-Nano Integrated Technology, Beijing 100083, China.

f. State Key Laboratory for Superlattices and Microstructures, Institute of Semiconductors, Chinese Academy of Sciences, Beijing 100083, China.

\* Correspondence: [xdwang@semi.ac.cn](mailto:xdwang@semi.ac.cn); Tel.: +86-010-8230-5042.

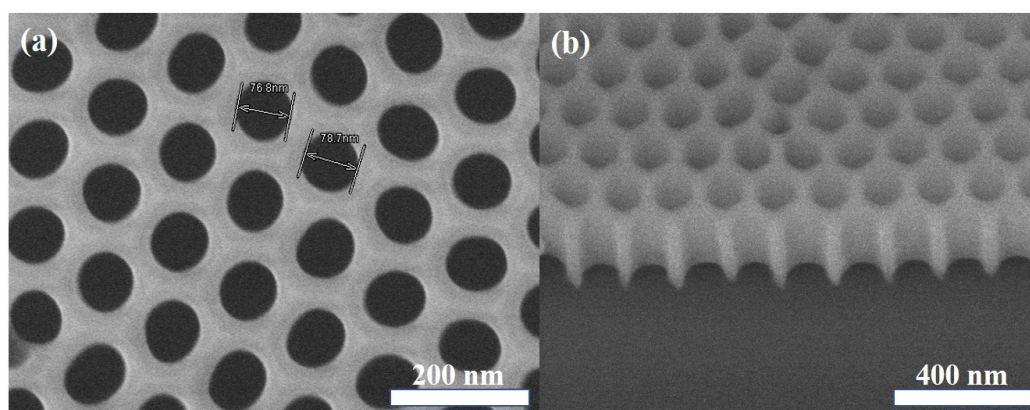

Fig. S1 SEM images of AAO template.

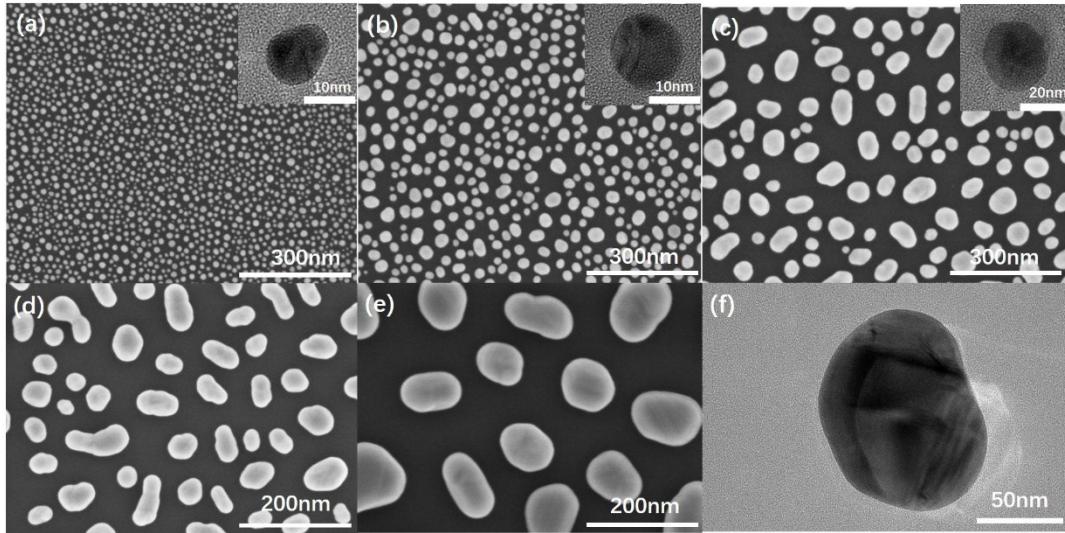

Fig. S2 SEM and TEM images of Ag particles under different Ag film thicknesses after annealing. (a)-(e): 3 nm, 6 nm, 9 nm, 12 nm, 15 nm. The enlarged images are corresponding TEM images. (f) TEM image of Ag particle with 15 nm Ag film after annealing.

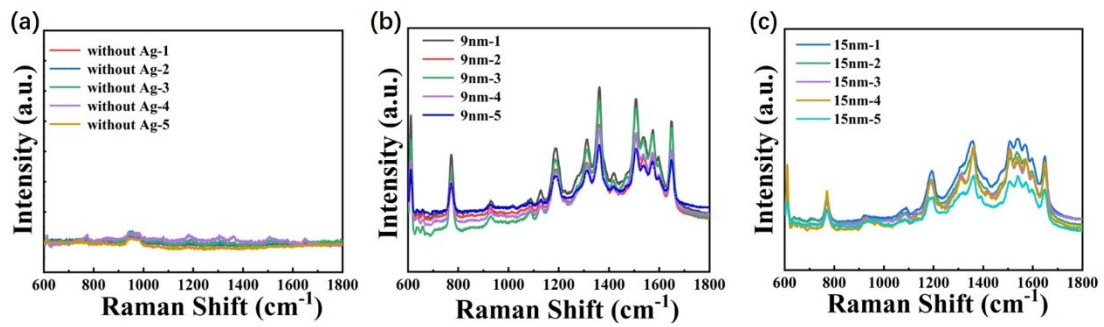

Fig. S3 The Raman spectra of R6G molecules collected at several sites randomly from Si substrate.
